# Supplementary material for: Reduced electron relaxation time of perovskite films via g-C3N4 quantum dot doping for high-performance perovskite solar cells
Source: Royal Society of Chemistry journal article supplement (doi:10.1039/d3ra02391e), 2023-01-01
Supplement: d3ra02391e1.pdf [file d3ra02391e1.pdf]

## Supporting Information

# Reduced Electron Relaxation Time of Perovskite Films via g-C<sub>3</sub>N<sub>4</sub> Quantum Dots Doping for High-Performance Perovskite Solar Cells

Lu-Lu Jiang <sup>a,\*</sup>, Meng-Meng Chen <sup>a</sup>, Xiao-Dan Tang <sup>a</sup>, Ying Tang <sup>a</sup>, Shao-Jie Li <sup>a</sup>, Ying Li <sup>a</sup>, Hang-Hui Li <sup>a</sup>, Hai-Rui Liu <sup>a,\*</sup>

<sup>a</sup> College of Material Science and Engineering, Henan Normal University, Xinxiang, Henan normal University, Xinxiang 453000, China

# Table of Contents

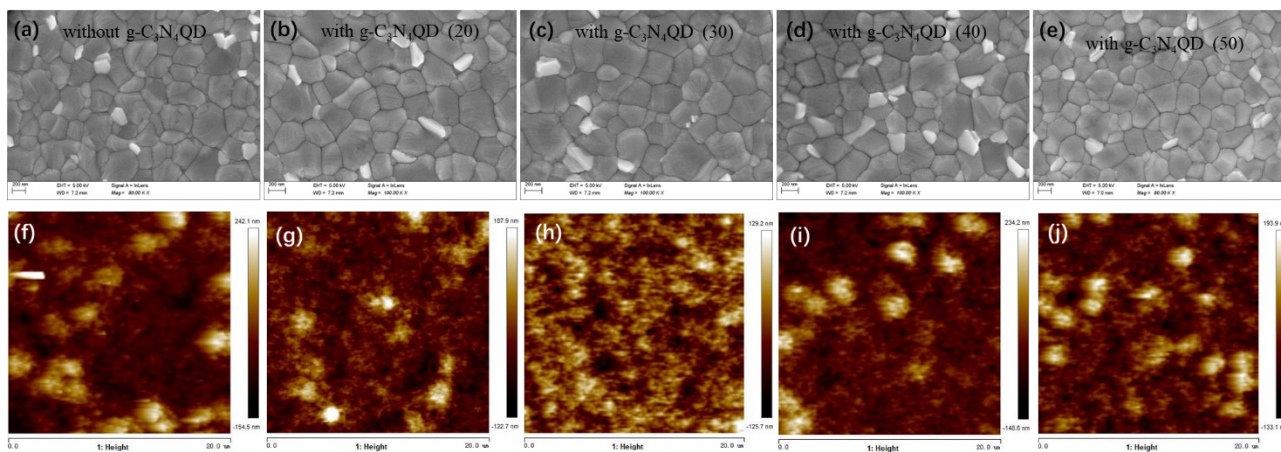

**Figure S1.** SEM and AFM images of perovskite films with different doping ratios of additives, respectively.

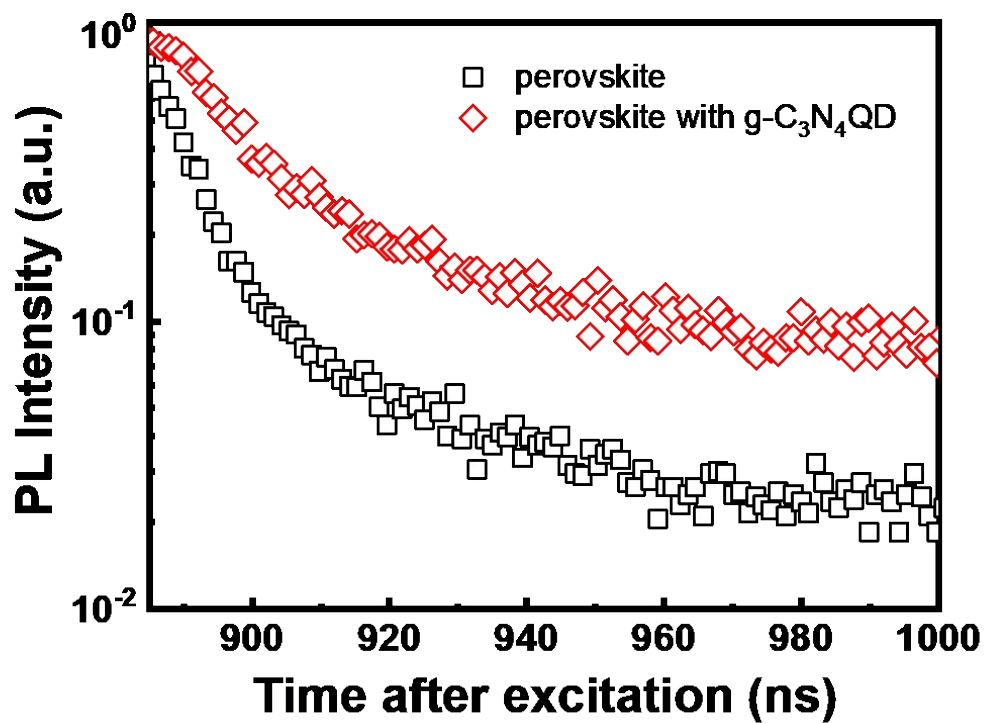

Figure S2. TR PL of perovskite films without and with the optimized concentration of additive (30).

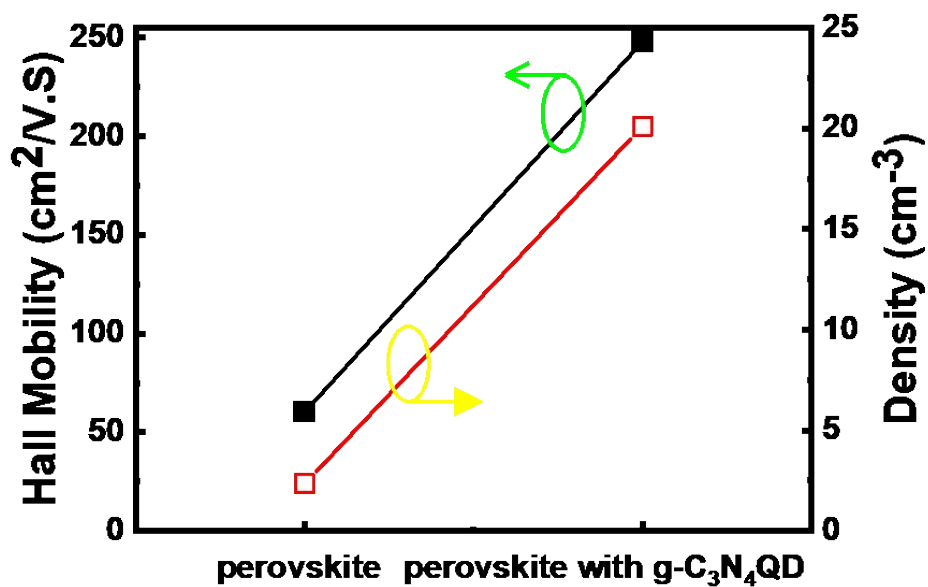

Figure S3. Hall effect of perovskite films without and with the optimized concentration of additive (30).

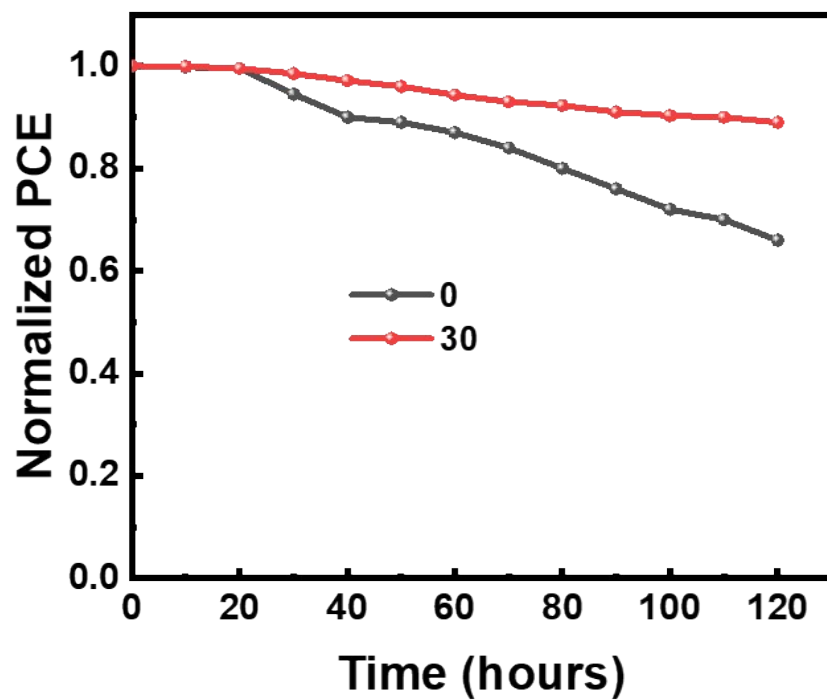

Figure S4. PCE stability test of device with g-C<sub>3</sub>N<sub>4</sub>QDs (0.4 wt%) and the control device in the air with RH (30%).

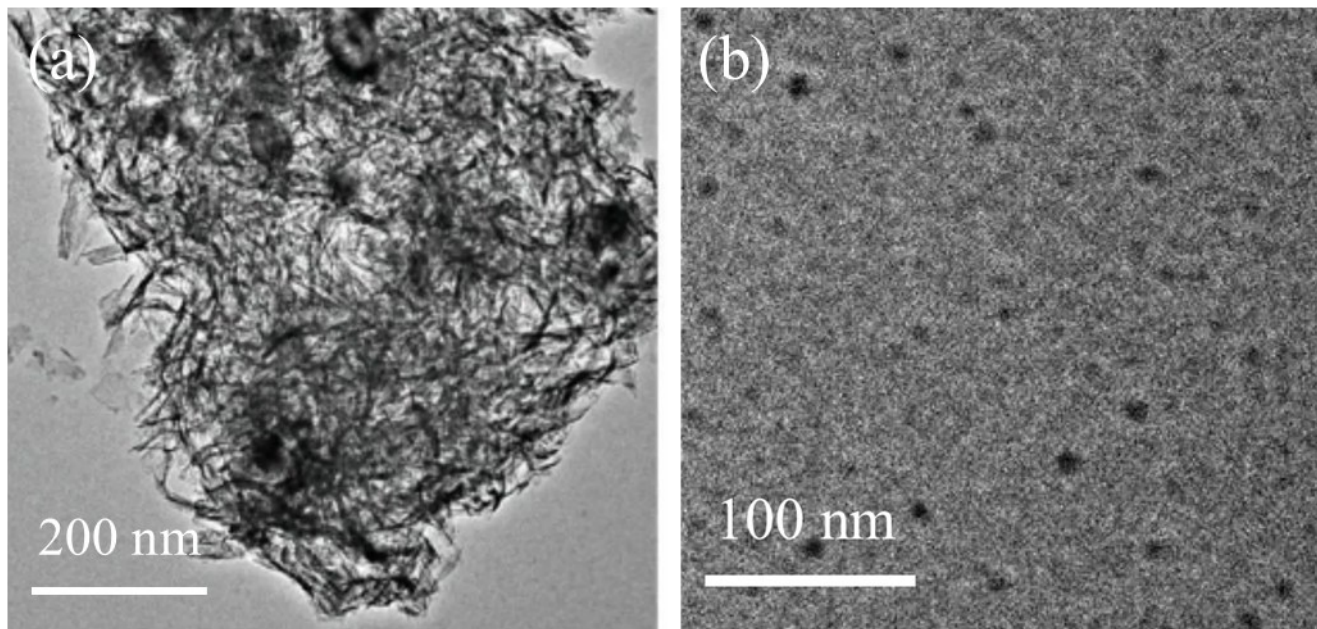

Figure S5. TEM images of (a) g-C<sub>3</sub>N<sub>4</sub> nanosheets (b) g-C<sub>3</sub>N<sub>4</sub>QDs.
